# Supplementary material for: Old carbon, new insights: thermal reactivity and bioavailability of saltmarsh soils
Source: Copernicus journal article supplement (doi:10.5194/bg-22-4851-2025), 2025-09-23
Supplement: Supplementary file [file bg-22-4851-2025-supplement-title-page.pdf › bg-22-4851-2025-supplement-title-page.pdf]

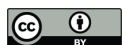

## *Supplement of*

# **Old carbon, new insights: thermal reactivity and bioavailability of saltmarsh soils**

**Alex Houston et al.**

*Correspondence to:* Alex Houston (ah383@st-andrews.ac.uk)

- bg-22-4851-2025-supplement-title-page.pdf
- Supplementary Information
  - S1
    - \* S1.1.xlsx
    - \* S1.2.xlsx
    - \* S1.3.xlsx
    - \* S1.4.xlsx
    - \* S1.5.xlsx
    - \* S1.6.xlsx
    - \* S1.7.xlsx
    - \* S1.8.xlsx
    - \* S1.9.xlsx
  - S2
    - \* S2\_rampedpyrox\_outputs

The copyright of individual parts of the supplement might differ from the article licence.
